# Supplementary material for: The Role of COL5A2 in Patients With Muscle-Invasive Bladder Cancer: A Bioinformatics Analysis of Public Datasets Involving 787 Subjects and 29 Cell Lines
Source: Front Oncol. 2019 Jan 15;8:659. doi: 10.3389/fonc.2018.00659 (PMC6340941; doi:10.3389/fonc.2018.00659)
Supplement: Supplementary Table 1 — Basic information of included datasets. [file Table_1.xlsx]

## Sheet: Sheet1
	Supplementary Table 1. Basic information of included datasets
	Identification	N*	Median survival (days)	Number of death	Method of Quantification	Number of Features#
	MIBC_CIT	73	780	43	Microarry (Affymetrix HG-U133 plus 2)	17541
	MIBC_TCGA	407	1008	179	RNA sequencing (illumina hiseq)	20501
	MIBC_ETABM147	22	660	17	Microarry (Affymetrix HG-U133A)	9150
	MIBC_GSE5287	30	1590	25	Microarry (Affymetrix HG-U133A)	12788
	MIBC_GSE13507	62	521	34	Microarray (Illumina Human-6 v2.0)	19017
	MIBC_GSE31684	78	536	59	Microarry (Affymetrix HG-U133 plus 2)	18937
	MIBC_GSE32894	51	NR	23	Microarray (Illumina HumanHT-12 V3.0)	15343
	MIBC_GSE48276	64	1425	34	Microarray (Illumina HumanHT-12 WG-DASL V4.0)	20818
	*: Number of MIBC patients.
	#: Genes available without missing values in the processed expression matrix.
	NR: not reached.
