# Supplementary material for: The Role of COL5A2 in Patients With Muscle-Invasive Bladder Cancer: A Bioinformatics Analysis of Public Datasets Involving 787 Subjects and 29 Cell Lines
Source: Front Oncol. 2019 Jan 15;8:659. doi: 10.3389/fonc.2018.00659 (PMC6340941; doi:10.3389/fonc.2018.00659)
Supplement: Supplementary Table 5 — Differentially mutated genes between the COL5A2 high and low expression groups. [file Table_5.xlsx]

## Sheet: Sheet1
	Supplementary Table 5. Differentially mutated genes between the COL5A2 high and low expression groups.
	Gene	COL5A2 low expression			COL5A2 high expression			a	b	c	d	chisq	P	FDR
		n.mut	n.p	Freq	n.mut	n.p	Freq
	FGFR3	52	46	0.2255	14	11	0.0542	46	158	11	192	24.7918	6.38693e-07	0.00910457
	SUPT20H	0	0	0	11	11	0.0542	0	204	11	192	11.3612	0.000749924	0.682621
	ABCA2	10	9	0.0441	0	0	0	9	195	0	203	9.1584	0.00247579	0.682621
	TIAM1	3	3	0.0147	16	15	0.0739	3	201	15	188	8.43204	0.00368666	0.682621
	KIAA0556	2	2	0.0098	13	13	0.064	2	202	13	190	8.43161	0.00368754	0.682621
	SPATA5	2	2	0.0098	13	13	0.064	2	202	13	190	8.43161	0.00368754	0.682621
	KIFC1	0	0	0	8	8	0.0394	0	204	8	195	8.2006	0.00418765	0.682621
	TAX1BP1	0	0	0	8	8	0.0394	0	204	8	195	8.2006	0.00418765	0.682621
	ITGA1	8	8	0.0392	0	0	0	8	196	0	203	8.1204	0.00437699	0.682621
	MTUS2	13	8	0.0392	0	0	0	8	196	0	203	8.1204	0.00437699	0.682621
	DNAH11	38	36	0.1765	20	17	0.0837	36	168	17	186	7.72416	0.00544866	0.682621
	LTBP2	1	1	0.0049	10	10	0.0493	1	203	10	193	7.61375	0.00579249	0.682621
	ADAMTS14	10	10	0.049	1	1	0.0049	10	194	1	202	7.52284	0.00609215	0.682621
	LRFN2	11	10	0.049	1	1	0.0049	10	194	1	202	7.52284	0.00609215	0.682621
	KIDINS220	17	16	0.0784	4	4	0.0197	16	188	4	199	7.51025	0.00613489	0.682621
	PLA2R1	4	3	0.0147	18	14	0.069	3	201	14	189	7.48447	0.00622335	0.682621
	AHI1	0	0	0	7	7	0.0345	0	204	7	196	7.15759	0.00746476	0.682621
	CLVS2	0	0	0	7	7	0.0345	0	204	7	196	7.15759	0.00746476	0.682621
	METTL13	0	0	0	7	7	0.0345	0	204	7	196	7.15759	0.00746476	0.682621
	MPP5	0	0	0	7	7	0.0345	0	204	7	196	7.15759	0.00746476	0.682621
	NPR1	0	0	0	8	7	0.0345	0	204	7	196	7.15759	0.00746476	0.682621
	NTRK1	0	0	0	7	7	0.0345	0	204	7	196	7.15759	0.00746476	0.682621
	OR14J1	0	0	0	8	7	0.0345	0	204	7	196	7.15759	0.00746476	0.682621
	PER1	0	0	0	7	7	0.0345	0	204	7	196	7.15759	0.00746476	0.682621
	PPIL4	0	0	0	7	7	0.0345	0	204	7	196	7.15759	0.00746476	0.682621
	PPP3CA	0	0	0	7	7	0.0345	0	204	7	196	7.15759	0.00746476	0.682621
	SCUBE1	0	0	0	8	7	0.0345	0	204	7	196	7.15759	0.00746476	0.682621
	SPATA31E1	0	0	0	7	7	0.0345	0	204	7	196	7.15759	0.00746476	0.682621
	TTYH1	0	0	0	7	7	0.0345	0	204	7	196	7.15759	0.00746476	0.682621
	C8A	7	7	0.0343	0	0	0	7	197	0	203	7.08759	0.00776197	0.682621
	EGFR	7	7	0.0343	0	0	0	7	197	0	203	7.08759	0.00776197	0.682621
	FADD	7	7	0.0343	0	0	0	7	197	0	203	7.08759	0.00776197	0.682621
	GATA3	8	7	0.0343	0	0	0	7	197	0	203	7.08759	0.00776197	0.682621
	KCNH1	7	7	0.0343	0	0	0	7	197	0	203	7.08759	0.00776197	0.682621
	OR4K2	9	7	0.0343	0	0	0	7	197	0	203	7.08759	0.00776197	0.682621
	STK10	7	7	0.0343	0	0	0	7	197	0	203	7.08759	0.00776197	0.682621
	FREM1	5	4	0.0196	17	15	0.0739	4	200	15	188	6.73714	0.0094426	0.682621
	ROS1	21	15	0.0735	4	4	0.0197	15	189	4	199	6.62374	0.0100629	0.682621
	CACHD1	1	1	0.0049	9	9	0.0443	1	203	9	194	6.60161	0.0101886	0.682621
	PCDHGA2	1	1	0.0049	12	9	0.0443	1	203	9	194	6.60161	0.0101886	0.682621
	PLEKHG4	1	1	0.0049	13	9	0.0443	1	203	9	194	6.60161	0.0101886	0.682621
	ZNF791	1	1	0.0049	11	9	0.0443	1	203	9	194	6.60161	0.0101886	0.682621
	FOLH1	9	9	0.0441	1	1	0.0049	9	195	1	202	6.52101	0.0106608	0.682621
	HSP90AB1	10	9	0.0441	1	1	0.0049	9	195	1	202	6.52101	0.0106608	0.682621
	NSUN6	9	9	0.0441	1	1	0.0049	9	195	1	202	6.52101	0.0106608	0.682621
	SIDT1	9	9	0.0441	1	1	0.0049	9	195	1	202	6.52101	0.0106608	0.682621
	NLRP3	2	2	0.0098	11	11	0.0542	2	202	11	192	6.48216	0.0108963	0.682621
	GOLGA2	13	13	0.0637	3	3	0.0148	13	191	3	200	6.45474	0.0110657	0.682621
	SCAPER	12	11	0.0539	2	2	0.0099	11	193	2	201	6.39079	0.0114714	0.682621
	FAM135B	5	5	0.0245	18	16	0.0788	5	199	16	187	6.13254	0.0132716	0.682621
		n.mut: number of mutations
		n.p: number of patients
		freq: frequency of mutated patients
		a, number with mutation in low group; b, number without mutation in low group; c, number with mutation in high group; d, number without mutation in high group.
