# Supplementary material for: The Role of COL5A2 in Patients With Muscle-Invasive Bladder Cancer: A Bioinformatics Analysis of Public Datasets Involving 787 Subjects and 29 Cell Lines
Source: Front Oncol. 2019 Jan 15;8:659. doi: 10.3389/fonc.2018.00659 (PMC6340941; doi:10.3389/fonc.2018.00659)
Supplement: Supplementary Table 6 — Node genes of the co-expression module containing COL5A2. [file Table_6.xlsx]

## Sheet: Sheet1
Supplementary Table 6. Node genes of the co-expression module containing COL5A2
	Genes
	THBS1
	SULF1
	LAMA4
	CTGF
	PCDHGA12
	ANGPTL2
	BEND6
	ITGA1
	LOX
	EMILIN1
	C1orf190
	LBH
	EDNRA
	FAP
	TGFB3
	CYR61
	ITGB1
	COL6A3
	ADAMTS2
	ANTXR1
	GREM1
	COL5A2
	FBN1
	LATS2
	DCN
	PDGFRB
	ANXA6
	GLT8D2
	PXDN
	FHL3
	NID1
	NRP2
	SYDE1
	GAS1
	COL3A1
	CYBRD1
	TIMP2
	ADAM12
	TMEM158
	CCPG1
	CTHRC1
	CDH11
	FNDC1
	PDLIM7
	ARMC9
	COL15A1
	MAP3K3
	FIBIN
	AFAP1
	P4HA3
	SVEP1
	BNC2
	CCL11
	COL1A2
	COL1A1
	FSTL1
	DACT1
	ALDH1L2
	OLFML1
	LTBP2
	CERCAM
	MMD
	LRRC15
	C5orf62
	FMO1
	PDGFC
	SH3RF3
	LRRC32
	GPX8
	GPC6
	CHSY3
	PDLIM2
	SPARC
	HSPG2
	ARL4C
	GXYLT2
	AEBP1
	C22orf26
	FAM26E
	FKBP10
	BICC1
	COL5A3
	CHSY1
	SEC24D
	MXRA5
	MMP14
	ARSB
	OLFML2B
	THY1
	MRC2
	SERPINF1
	MMP2
	ECM2
	PRSS23
	ADAMTS5
	SPON2
	FAM180A
	COL16A1
	HTRA3
	FAM20C
	DDR2
	CCIN
	COPZ2
	COL18A1
	SGIP1
	ST6GALNAC5
	APBB2
	MOXD1
	SFRP2
	C1QTNF1
	POSTN
	CALHM2
	GLIS2
	NNMT
	LAMB2
	MXRA8
	COL5A1
	CCDC80
	ITGBL1
	EXOC1
	BGN
	KAL1
	LRP1
	HEYL
	COL11A1
	BMP1
	GUCY1A3
	COL12A1
	LOC100134259
	HTRA1
	F2R
	MMP23B
	PRKCDBP
	EFEMP2
	CHPF2
	RASGRF2
	TMEM200A
	GUCY1B3
	LOXL2
	SH3PXD2B
	PPEF1
	COL8A1
	DPT
	RASSF8
	LUM
	ST6GALNAC6
	CD99
	FAM198B
	C10orf26
	RGS3
	RECK
	PHC2
	COL6A1
	CSMD2
	PPAPDC1A
	PLXDC2
	GADD45B
	PRRX1
	PLOD1
	ISLR
	OLFML3
	COL6A2
	RCN3
	KRR1
	NBL1
	SC65
	FKBP9
	SFRP4
	FKBP7
	HHIPL1
	THBS2
	TIMP1
	LGALS1
	LAMB1
	EVC
	PNMAL2
	BMP8A
	RUNX1
	CCDC8
	NTM
	PLXDC1
	MFRP
	CD248
	FBLN2
	FAM19A5
	GLI1
	PTTG1IP
	PDGFRL
	RPLP0P2
	PHLDB1
	NOX4
	DIO2
	FAM109B
	SCARF2
	MATN3
	SSC5D
	NCRNA00181
	BTBD19
	FGF14
	PRRX2
	RARRES2
	CMTM3
	PODNL1
	TMEM119
	SERPINH1
	MMP11
	DKK3
	COL8A2
	DIRC1
	DMWD
	SMPD1
	SORBS3
	TM6SF2
	CHPF
	ADAMTS10
	CRYGN
	SPOCK1
	CYS1
	SLC24A2
	FAM65A
	COMP
	LEPREL2
	CD276
	SLC39A13
	RUNX2
	FFAR3
	EXTL1
	COL6A6
	KCNIP3
	EDIL3
	CILP2
	CAPZB
	LEPRE1
	CHN1
	SPSB1
	DKK2
	THBS3
	C14orf37
	LOC654342
	A1BG
	ADC
	CLIP2
