# Supplementary material for: The Role of COL5A2 in Patients With Muscle-Invasive Bladder Cancer: A Bioinformatics Analysis of Public Datasets Involving 787 Subjects and 29 Cell Lines
Source: Front Oncol. 2019 Jan 15;8:659. doi: 10.3389/fonc.2018.00659 (PMC6340941; doi:10.3389/fonc.2018.00659)
Supplement: Supplementary Table 8 — Map of drugs (whose IC50 correlates with COL5A2) and target genes. [file Table_8.xlsx]

## Sheet: Sheet1
Supplementary Table 8. Map of drugs (whose IC50 correlates with COL5A2) and target genes
	Drug	Genes
	aew-541	BRAF
	aew-541	PTEN
	aew-541	PIK3CA
	aew-541	IGF1R
	amuvatinib	FLT3
	amuvatinib	FLT3
	amuvatinib	FLT3
	amuvatinib	FLT3
	amuvatinib	KIT
	amuvatinib	KIT
	amuvatinib	KIT
	amuvatinib	KIT
	amuvatinib	KIT
	amuvatinib	MET
	amuvatinib	MET
	amuvatinib	MET
	amuvatinib	MET
	amuvatinib	MET
	amuvatinib	MET
	amuvatinib	PDGFRA
	amuvatinib	PDGFRA
	amuvatinib	PDGFRA
	amuvatinib	PDGFRB
	amuvatinib	RAD51
	amuvatinib	RET
	amuvatinib	RET
	amuvatinib	RET
	bms-754807	EGFR
	bms-754807	ETV6
	bms-754807	IGF1R
	bms-754807	IGF1R
	bms-754807	IGF1R
	bms-754807	IGF1R
	bms-754807	IGF1R
	bms-754807	INSR
	bms-754807	INSR
	bms-754807	KRAS
	bms-754807	PTEN
	bx-795	CHEK1
	bx-795	CDK2
	bx-795	GSK3B
	bx-795	KDR
	bx-795	PRKAR2B
	bx-795	PDPK1
	cetuximab	AREG
	cetuximab	BAX
	cetuximab	BDNF
	cetuximab	BRAF
	cetuximab	BRAF
	cetuximab	BRAF
	cetuximab	BRAF
	cetuximab	BRAF
	cetuximab	CXCL8
	cetuximab	CXCL8
	cetuximab	CXCL8
	cetuximab	DNTT
	cetuximab	EGF
	cetuximab	EGFR
	cetuximab	EGFR
	cetuximab	EGFR
	cetuximab	EGFR
	cetuximab	EGFR
	cetuximab	EGFR
	cetuximab	EGFR
	cetuximab	EGFR
	cetuximab	EGFR
	cetuximab	EGFR
	cetuximab	EGFR
	cetuximab	EGFR
	cetuximab	EGFR
	cetuximab	EGFR
	cetuximab	EGFR
	cetuximab	EPO
	cetuximab	ERBB2
	cetuximab	ERBB2
	cetuximab	ERBB3
	cetuximab	ERBB4
	cetuximab	EREG
	cetuximab	FCGR3A
	cetuximab	FGFR2
	cetuximab	HNF4A
	cetuximab	HRAS
	cetuximab	KDR
	cetuximab	KRAS
	cetuximab	KRAS
	cetuximab	KRAS
	cetuximab	KRAS
	cetuximab	KRAS
	cetuximab	KRAS
	cetuximab	KRAS
	cetuximab	MAP2K1
	cetuximab	MAP2K1
	cetuximab	MET
	cetuximab	MET
	cetuximab	NF2
	cetuximab	NRAS
	cetuximab	NRAS
	cetuximab	NRAS
	cetuximab	NRAS
	cetuximab	NRAS
	cetuximab	NRG1
	cetuximab	NT5E
	cetuximab	PIK3CA
	cetuximab	PIK3CA
	cetuximab	PIK3CA
	cetuximab	PTEN
	cetuximab	PTEN
	cetuximab	PTEN
	cetuximab	PTP4A3
	cetuximab	RARA
	cetuximab	RET
	cetuximab	SMAD4
	cetuximab	TP53
	cetuximab	VPS37A
	ci-1040	BRAF
	ci-1040	ERBB2
	ci-1040	HRAS
	ci-1040	KRAS
	ci-1040	MAP2K1
	ci-1040	MAP2K1
	ci-1040	MAP2K1
	ci-1040	MAP2K1
	ci-1040	MAP2K2
	ci-1040	MAP2K2
	ci-1040	PTEN
	ci-1040	STK11
	cytarabine	BIRC5
	cytarabine	CCND1
	cytarabine	CDA
	cytarabine	CDA
	cytarabine	CDA
	cytarabine	CSF2
	cytarabine	FCGR3A
	cytarabine	FCGR3B
	cytarabine	FLT3
	cytarabine	GATA1
	cytarabine	GSTP1
	cytarabine	HSPA4
	cytarabine	IL1B
	cytarabine	ITGAV
	cytarabine	KIT
	cytarabine	KMT2A
	cytarabine	MAGEA1
	cytarabine	NRAS
	cytarabine	NRG1
	cytarabine	NTRK1
	cytarabine	POLA1
	cytarabine	POLB
	cytarabine	POLB
	cytarabine	POLD1
	cytarabine	POLE
	cytarabine	RUNX1
	cytarabine	SLC29A1
	cytarabine	TP53
	cytarabine	TP73
	cytarabine	VDR
	cytarabine	WT1
	cytarabine	XIAP
	dacinostat	HDAC1
	dacinostat	HDAC1
	dacinostat	HDAC1
	dacinostat	HDAC2
	dacinostat	HDAC3
	dacinostat	HDAC4
	dacinostat	HDAC5
	dacinostat	HDAC6
	dacinostat	HDAC7
	dacinostat	HDAC8
	dacinostat	HDAC9
	dacinostat	KMT2A
	docetaxel	BAX
	docetaxel	BCL2
	docetaxel	BIRC5
	docetaxel	BRD4
	docetaxel	ERBB2
	docetaxel	ERBB2
	docetaxel	FBXW7
	docetaxel	FOLH1
	docetaxel	FOLH1
	docetaxel	GAS6
	docetaxel	GSTM1
	docetaxel	GSTP1
	docetaxel	HRAS
	docetaxel	IGF2
	docetaxel	KLK3
	docetaxel	KRAS
	docetaxel	KRAS
	docetaxel	KRAS
	docetaxel	KRAS
	docetaxel	MCL1
	docetaxel	MUC16
	docetaxel	NOTCH1
	docetaxel	PGP
	docetaxel	RRM1
	docetaxel	SLCO1B1
	docetaxel	STK11
	docetaxel	STK11
	docetaxel	TLE3
	docetaxel	TP53
	docetaxel	TP53
	docetaxel	TUBB
	docetaxel	TUBB1
	docetaxel	TUBB1
	docetaxel	TUBB3
	docetaxel	XRCC1
	enzastaurin	AKT1
	enzastaurin	BCOR
	enzastaurin	GNAQ
	enzastaurin	GSK3B
	enzastaurin	JAK1
	enzastaurin	PRKCA
	enzastaurin	PRKCA
	enzastaurin	PRKCB
	enzastaurin	PRKCB
	enzastaurin	PRKCB
	enzastaurin	PRKCB
	enzastaurin	PRKCB
	enzastaurin	PRKCB
	enzastaurin	PRKCD
	enzastaurin	PRKCE
	enzastaurin	PRKCG
	enzastaurin	PRKCG
	gefitinib	ABCB1
	gefitinib	ABCB1
	gefitinib	BRAF
	gefitinib	BRAF
	gefitinib	CEACAM5
	gefitinib	CYP3A5
	gefitinib	EGFR
	gefitinib	EGFR
	gefitinib	EGFR
	gefitinib	EGFR
	gefitinib	EGFR
	gefitinib	EGFR
	gefitinib	EGFR
	gefitinib	EGFR
	gefitinib	EGFR
	gefitinib	EGFR
	gefitinib	EGFR
	gefitinib	EGFR
	gefitinib	EGFR
	gefitinib	EGFR
	gefitinib	EGFR
	gefitinib	EGFR
	gefitinib	EMP1
	gefitinib	ERBB2
	gefitinib	ERBB2
	gefitinib	ERBB2
	gefitinib	ERBB2
	gefitinib	ERBB3
	gefitinib	ERBB3
	gefitinib	ERBB4
	gefitinib	FGFR1
	gefitinib	FGFR2
	gefitinib	IGF2
	gefitinib	KRAS
	gefitinib	KRAS
	gefitinib	KRAS
	gefitinib	MAPK8
	gefitinib	MET
	gefitinib	MET
	gefitinib	NRAS
	gefitinib	PBK
	gefitinib	PDGFRA
	gefitinib	PLAU
	gefitinib	PTEN
	gefitinib	PTEN
	gefitinib	PTEN
	gefitinib	SMO
	gefitinib	SMO
	gsk429286a	ROCK1
	gsk429286a	ADRA2B
	gsk429286a	HRH1
	gsk429286a	HRH2
	gsk429286a	ADRA2C
	gsk429286a	RPS6KA1
	gsk429286a	ADRA2A
	gsk429286a	ADRA1A
	irinotecan	TOP1
	irinotecan	ISG15
	irinotecan	BRAF
	irinotecan	KRAS
	irinotecan	AKT1
	irinotecan	TP53
	irinotecan	DKK1
	irinotecan	ABCC1
	irinotecan	TOP1MT
	irinotecan	TYMS
	irinotecan	EGFR
	irinotecan	MAPK10
	irinotecan	PIK3CA
	irinotecan	RAD50
	irinotecan	MTHFR
	irinotecan	RUNX3
	irinotecan	ERBB2
	irinotecan	ATM
	irinotecan	BRCA2
	irinotecan	BIRC5
	irinotecan	SMAD4
	irinotecan	GSTP1
	irinotecan	UGT1A1
	irinotecan	CDKN1A
	irinotecan	BCHE
	irinotecan	GSTM1
	irinotecan	E2F1
	irinotecan	ATRX
	irinotecan	BRCA1
	irinotecan	MGMT
	masitinib	ABL1
	masitinib	CSF1R
	masitinib	FGFR1
	masitinib	FGFR2
	masitinib	FGFR3
	masitinib	FGFR3
	masitinib	FGFR3
	masitinib	HCK
	masitinib	KIT
	masitinib	KIT
	masitinib	KIT
	masitinib	KIT
	masitinib	KIT
	masitinib	KIT
	masitinib	LYN
	masitinib	LYN
	masitinib	PDGFRA
	masitinib	PDGFRA
	masitinib	PDGFRA
	masitinib	PDGFRA
	masitinib	PDGFRB
	masitinib	PDGFRB
	masitinib	PDGFRB
	masitinib	PDGFRB
	masitinib	PTK2
	masitinib	SRC
	methotrexate	ABCC4
	methotrexate	ABCC4
	methotrexate	ADA
	methotrexate	AFP
	methotrexate	ALOX5
	methotrexate	ATIC
	methotrexate	BAX
	methotrexate	BIRC5
	methotrexate	CCND1
	methotrexate	CCND1
	methotrexate	CDKN1B
	methotrexate	DHFR
	methotrexate	DHFR
	methotrexate	DHFR
	methotrexate	DHFR
	methotrexate	DHFR
	methotrexate	DHFR
	methotrexate	E2F1
	methotrexate	FCGR3B
	methotrexate	FLT3
	methotrexate	FOLH1
	methotrexate	GLS
	methotrexate	GSTM1
	methotrexate	HGF
	methotrexate	HSPB2
	methotrexate	ICAM3
	methotrexate	IL1RN
	methotrexate	IL2
	methotrexate	KCNA1
	methotrexate	NOTCH1
	methotrexate	NR3C1
	methotrexate	NTRK1
	methotrexate	RB1
	methotrexate	S100A12
	methotrexate	S100A12
	methotrexate	S100A8
	methotrexate	SLAMF1
	methotrexate	SLC19A1
	methotrexate	SLCO1B1
	methotrexate	SULT2A1
	methotrexate	TAT
	methotrexate	TPM3
	methotrexate	TYMS
	midostaurin	AURKB
	midostaurin	ETV6
	midostaurin	FGFR1
	midostaurin	FLT3
	midostaurin	FLT3
	midostaurin	FLT3
	midostaurin	FLT3
	midostaurin	FLT3
	midostaurin	FLT3
	midostaurin	FLT3
	midostaurin	FLT3
	midostaurin	FLT3
	midostaurin	FLT3
	midostaurin	FLT3
	midostaurin	HSPA4
	midostaurin	IL2
	midostaurin	IL6
	midostaurin	KDR
	midostaurin	KDR
	midostaurin	KIT
	midostaurin	KIT
	midostaurin	KIT
	midostaurin	KIT
	midostaurin	KIT
	midostaurin	KIT
	midostaurin	KRAS
	midostaurin	NPM1
	midostaurin	NTRK3
	midostaurin	PDGFRA
	midostaurin	PDGFRA
	midostaurin	PDGFRB
	midostaurin	PIK3CA
	midostaurin	PIK3CB
	midostaurin	PRKCA
	midostaurin	PRKCA
	midostaurin	PRKCB
	midostaurin	PRKCD
	midostaurin	PRKCE
	midostaurin	PRKCG
	midostaurin	PRKCG
	midostaurin	PRKCH
	midostaurin	PRKCI
	midostaurin	PRKCQ
	midostaurin	PRKCZ
	midostaurin	PRKD1
	midostaurin	PRKD3
	midostaurin	TNF
	motesanib	FLT1
	motesanib	FLT1
	motesanib	FLT1
	motesanib	FLT1
	motesanib	FLT1
	motesanib	FLT4
	motesanib	FLT4
	motesanib	FLT4
	motesanib	FLT4
	motesanib	FLT4
	motesanib	KDR
	motesanib	KDR
	motesanib	KDR
	motesanib	KDR
	motesanib	KDR
	motesanib	KDR
	motesanib	KDR
	motesanib	KIT
	motesanib	KIT
	motesanib	KIT
	motesanib	KIT
	motesanib	KIT
	motesanib	KIT
	motesanib	PDGFRA
	motesanib	PDGFRA
	motesanib	PDGFRA
	motesanib	PDGFRB
	motesanib	PDGFRB
	motesanib	PDGFRB
	motesanib	PDGFRB
	motesanib	RET
	motesanib	RET
	motesanib	RET
	motesanib	RET
	motesanib	RET
	motesanib	TLR7
	motesanib	TLR7
	motesanib	TLR8
	motesanib	TLR8
	motesanib	TLR9
	motesanib	TLR9
	navitoclax	BCL2
	navitoclax	BCL2
	navitoclax	BCL2
	navitoclax	BCL2
	navitoclax	BCL2
	navitoclax	BCL2L1
	navitoclax	BCL2L1
	navitoclax	BCL2L1
	navitoclax	BCL2L1
	navitoclax	BCL2L1
	navitoclax	BCL2L2
	navitoclax	BCL2L2
	navitoclax	BCL2L2
	navitoclax	BCL2L2
	navitoclax	BRAF
	navitoclax	BRAF
	navitoclax	KRAS
	navitoclax	KRAS
	navitoclax	PIK3CA
	navitoclax	PIK3CA
	navitoclax	PTEN
	navitoclax	TP53
	navitoclax	TP53
	obatoclax mesylate	BCL2
	obatoclax mesylate	BCL2A1
	obatoclax mesylate	BCL2L1
	obatoclax mesylate	BCL2L10
	obatoclax mesylate	BCL2L2
	obatoclax mesylate	MCL1
	olaparib	ATM
	olaparib	ATM
	olaparib	ATM
	olaparib	ATM
	olaparib	ATM
	olaparib	ATR
	olaparib	ATR
	olaparib	BRCA1
	olaparib	BRCA1
	olaparib	BRCA1
	olaparib	BRCA1
	olaparib	BRCA1
	olaparib	BRCA1
	olaparib	BRCA2
	olaparib	BRCA2
	olaparib	BRCA2
	olaparib	BRCA2
	olaparib	BRCA2
	olaparib	BRCA2
	olaparib	CBLC
	olaparib	CDK12
	olaparib	CHEK1
	olaparib	CHEK2
	olaparib	ERBB2
	olaparib	FANCA
	olaparib	HDAC2
	olaparib	IDH1
	olaparib	IDH1
	olaparib	IDH2
	olaparib	KRAS
	olaparib	MET
	olaparib	PALB2
	olaparib	PARP1
	olaparib	PARP1
	olaparib	PARP1
	olaparib	PARP1
	olaparib	PARP1
	olaparib	PARP1
	olaparib	PARP1
	olaparib	PARP2
	olaparib	PARP2
	olaparib	PARP2
	olaparib	PARP2
	olaparib	PARP2
	olaparib	PARP3
	olaparib	PIK3CA
	olaparib	PIK3CA
	olaparib	PTEN
	olaparib	PTEN
	olaparib	STAG2
	olaparib	TP53
	olaparib	VHL
	pd-0325901	MAP2K3
	pd-0325901	MAP2K1
	pd-0325901	MAP2K2
	pd-0325901	MAP2K7
	pd-0325901	MAP2K4
	pd-0325901	MAP2K5
	pd-0325901	MAP2K6
	pd-0325901	DDX43
	pd-0325901	NF1
	pd-0325901	BRAF
	pd-0325901	STK11
	pd-0325901	PIK3CA
	pd-0325901	GNA11
	pd-0325901	GNAQ
	pd-0325901	HRAS
	pd-0325901	KIT
	pd-0325901	NRAS
	pd-0325901	PTEN
	pd-0325901	TP53
	pd-0325901	KRAS
	sb-216763	GSK3A
	sb-216763	GSK3B
	sb-505124	TGFBR1
	sn-38	TOP1
	sn-38	UGT1A3
	sn-38	UGT1A6
	sn-38	UGT1A1
	sn-38	UGT1A7
	sn-38	UGT1A10
	sn-38	TOP1MT
	sn-38	UGT1A8
	sn-38	MROH2A
	sn-38	UGT1A5
	sn-38	UGT1A4
	sn-38	UGT1A9
	tamoxifen	AURKA
	tamoxifen	BGLAP
	tamoxifen	BRCA1
	tamoxifen	CCND1
	tamoxifen	CCND1
	tamoxifen	CETP
	tamoxifen	COL18A1
	tamoxifen	DHFR
	tamoxifen	EDN1
	tamoxifen	ERBB2
	tamoxifen	ERBB2
	tamoxifen	ESR1
	tamoxifen	ESR1
	tamoxifen	ESR1
	tamoxifen	ESR1
	tamoxifen	ESR1
	tamoxifen	ESR1
	tamoxifen	ESR1
	tamoxifen	ESR1
	tamoxifen	ESR1
	tamoxifen	ESR2
	tamoxifen	ESR2
	tamoxifen	F2
	tamoxifen	F5
	tamoxifen	GAPDH
	tamoxifen	GGT1
	tamoxifen	GPER1
	tamoxifen	HEXB
	tamoxifen	HSPB2
	tamoxifen	KLK3
	tamoxifen	LRRK2
	tamoxifen	MUC16
	tamoxifen	MYOD1
	tamoxifen	NCOA3
	tamoxifen	NF1
	tamoxifen	NFE2L2
	tamoxifen	NRG1
	tamoxifen	NTRK1
	tamoxifen	NTRK1
	tamoxifen	PGR
	tamoxifen	PGR
	tamoxifen	PGR
	tamoxifen	PIK3CA
	tamoxifen	PIP
	tamoxifen	PLD1
	tamoxifen	TFF3
	tamoxifen	TGFB1
	tamoxifen	TGM2
	tamoxifen	TP53
	tamoxifen	TYMS
	tamoxifen	UGT1A4
	tamoxifen	VDR
	tamoxifen	VDR
	tanespimycin	HSP90AA1
	tanespimycin	HSP90AA1
	tanespimycin	HSP90AA1
	tanespimycin	HSP90AA1
	tanespimycin	HSP90AA2P
	tanespimycin	HSP90AB1
	tanespimycin	HSP90AB1
	tanespimycin	HSP90AB1
	tanespimycin	MET
	tanespimycin	TP53
	tretinoin	ADH1C
	tretinoin	ALDH1A2
	tretinoin	ALPL
	tretinoin	AMH
	tretinoin	APOA1
	tretinoin	APOE
	tretinoin	BAX
	tretinoin	BCL2
	tretinoin	BCOR
	tretinoin	BHLHE40
	tretinoin	BIRC5
	tretinoin	BIRC5
	tretinoin	CALR
	tretinoin	CD55
	tretinoin	CDKN1B
	tretinoin	CDKN1B
	tretinoin	CEACAM1
	tretinoin	CXCL8
	tretinoin	DUSP6
	tretinoin	EGR2
	tretinoin	FAS
	tretinoin	FLT3
	tretinoin	FLT3
	tretinoin	FUS
	tretinoin	GLI1
	tretinoin	HAS3
	tretinoin	HES1
	tretinoin	HOXB1
	tretinoin	HOXD1
	tretinoin	HSPA8
	tretinoin	IFNG
	tretinoin	IL10
	tretinoin	IL1R1
	tretinoin	ITGB2
	tretinoin	KLK3
	tretinoin	LIF
	tretinoin	MAPK8
	tretinoin	MDK
	tretinoin	MST1
	tretinoin	MYCN
	tretinoin	MYCN
	tretinoin	MYOD1
	tretinoin	NFE2L2
	tretinoin	NOS1
	tretinoin	NPM1
	tretinoin	NR2C1
	tretinoin	NR2C2
	tretinoin	NR4A1
	tretinoin	NRIP1
	tretinoin	OCLN
	tretinoin	P2RY2
	tretinoin	PML
	tretinoin	PML
	tretinoin	PML
	tretinoin	PPARD
	tretinoin	PRL
	tretinoin	PTCH1
	tretinoin	PTPRZ1
	tretinoin	RARA
	tretinoin	RARA
	tretinoin	RARA
	tretinoin	RARA
	tretinoin	RARA
	tretinoin	RARB
	tretinoin	RARB
	tretinoin	RARG
	tretinoin	RARG
	tretinoin	RARG
	tretinoin	RARRES1
	tretinoin	RB1
	tretinoin	RET
	tretinoin	RORB
	tretinoin	RPE65
	tretinoin	RXRB
	tretinoin	RXRB
	tretinoin	RXRG
	tretinoin	RXRG
	tretinoin	SFTPA1
	tretinoin	SHH
	tretinoin	SLC2A1
	tretinoin	SMAD2
	tretinoin	SMARCA4
	tretinoin	SPP1
	tretinoin	TBP
	tretinoin	TG
	tretinoin	TG
	tretinoin	TGFB1
	tretinoin	TGFBR3
	tretinoin	THBS1
	tretinoin	THBS1
	tretinoin	TP73
	tretinoin	TPO
	tretinoin	TSPYL2
	tretinoin	WT1
	tretinoin	XIAP
	veliparib	ATM
	veliparib	ATM
	veliparib	ATR
	veliparib	BRCA1
	veliparib	BRCA1
	veliparib	BRCA1
	veliparib	BRCA2
	veliparib	BRCA2
	veliparib	BRCA2
	veliparib	MET
	veliparib	PARP1
	veliparib	PARP1
	veliparib	PARP1
	veliparib	PARP1
	veliparib	PARP1
	veliparib	PARP1
	veliparib	PARP2
	veliparib	PARP2
	veliparib	PARP2
	veliparib	PARP2
	veliparib	PARP2
	veliparib	PARP2
	veliparib	PARP3
	veliparib	PTEN
	veliparib	STAG2
	vinblastine	ABCB4
	vinblastine	CDKN1A
	vinblastine	CGA
	vinblastine	CSF2
	vinblastine	KLK3
	vinblastine	MMP2
	vinblastine	NF1
	vinblastine	PTHLH
	vinblastine	TBXA2R
	vinblastine	TRH
	vinblastine	TUBB
	vinblastine	TUBB2A
	vinblastine	TUBB2A
	vismodegib	PTCH1
	vismodegib	PTCH1
	vismodegib	PTCH1
	vismodegib	PTCH1
	vismodegib	SMO
	vismodegib	SMO
	vismodegib	SMO
	vismodegib	SMO
	vismodegib	SMO
	vismodegib	SMO
	vismodegib	SMO
	vismodegib	SMO
	vorinostat	BAP1
	vorinostat	BIRC5
	vorinostat	BRAF
	vorinostat	ERBB2
	vorinostat	EZH2
	vorinostat	FBXW7
	vorinostat	GNA11
	vorinostat	HDAC1
	vorinostat	HDAC1
	vorinostat	HDAC1
	vorinostat	HDAC1
	vorinostat	HDAC1
	vorinostat	HDAC1
	vorinostat	HDAC1
	vorinostat	HDAC10
	vorinostat	HDAC10
	vorinostat	HDAC10
	vorinostat	HDAC11
	vorinostat	HDAC11
	vorinostat	HDAC11
	vorinostat	HDAC2
	vorinostat	HDAC2
	vorinostat	HDAC2
	vorinostat	HDAC2
	vorinostat	HDAC2
	vorinostat	HDAC3
	vorinostat	HDAC3
	vorinostat	HDAC3
	vorinostat	HDAC3
	vorinostat	HDAC3
	vorinostat	HDAC4
	vorinostat	HDAC4
	vorinostat	HDAC5
	vorinostat	HDAC5
	vorinostat	HDAC6
	vorinostat	HDAC6
	vorinostat	HDAC6
	vorinostat	HDAC6
	vorinostat	HDAC6
	vorinostat	HDAC7
	vorinostat	HDAC7
	vorinostat	HDAC8
	vorinostat	HDAC8
	vorinostat	HDAC8
	vorinostat	HDAC9
	vorinostat	HDAC9
	vorinostat	HDAC9
	vorinostat	HDAC9
	vorinostat	MYC
	vorinostat	MYD88
	vorinostat	NPM1
	vorinostat	PTEN
	vorinostat	RB1
	vorinostat	SMARCB1
	vorinostat	TP53
	vx-702	MAPK11
	vx-702	MAPK11
	vx-702	MAPK12
	vx-702	MAPK12
	vx-702	MAPK13
	vx-702	MAPK14
	vx-702	MAPK14
	vx-702	MAPK14
	y-39983	ROCK1
	y-39983	ROCK2
	zd-6474	EPHB6
	zd-6474	ABL1
	zd-6474	EPHA3
	zd-6474	EPHA6
	zd-6474	PTK6
	zd-6474	KDR
	zd-6474	IDH1
	zd-6474	EPHA5
	zd-6474	EGFR
	zd-6474	PTEN
	zd-6474	EPHA1
	zd-6474	FLT1
	zd-6474	TEK
	zd-6474	EPHB3
	zd-6474	EPHB4
	zd-6474	EPHA2
	zd-6474	ERBB2
	zd-6474	ERBB3
	zd-6474	ERBB4
	zd-6474	EPHB2
	zd-6474	KRAS
	zd-6474	EPHA7
	zd-6474	EPHA4
	zd-6474	EPHA10
	zd-6474	RET
	zd-6474	SRC
	zd-6474	ATM
	zd-6474	APC
	zd-6474	EPHB1
	zd-6474	VEGFA
	zd-6474	FLT4
	zd-6474	EPHA8
